# Supplementary material
Source: PubMed Central journal article supplement (PMC3773736)
Supplement: 1308459110_pnas.201308459SI.pdf [file 1308459110_pnas.201308459SI.pdf]

# Supporting Information

Shokur et al. 10.1073/pnas.1308459110

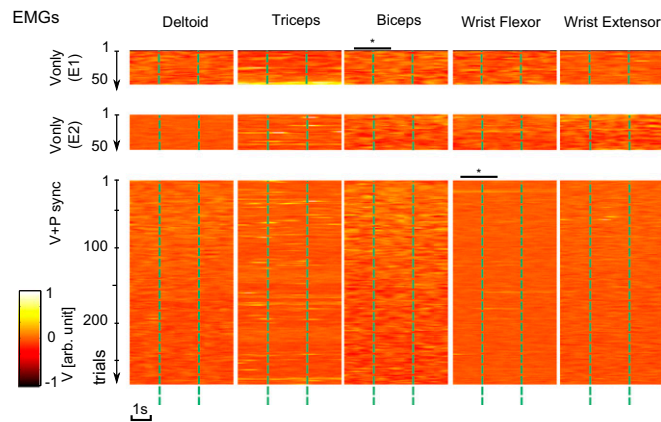

Fig. S1. Single-trial electromyograms (EMGs) of the five arm muscles recorded simultaneously with the neurons shown in Fig. 2A.

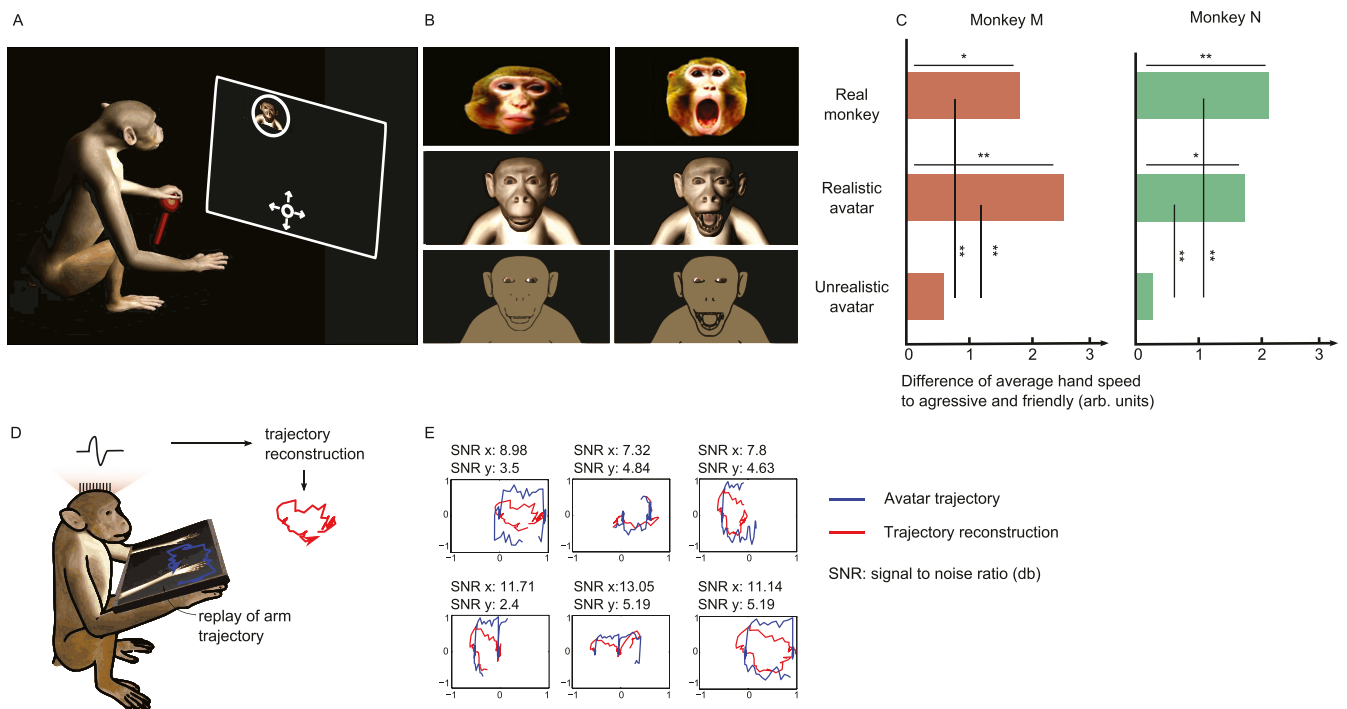

Fig. S2. Monkey responses to the realistic 3D avatar. (A) Schematics of an experimental task that required naive monkeys to perform center-out reaching movements toward peripheral targets that could be empty white rings or, less frequently (10% of all trials), rings framing images of monkey faces. Monkeys M and N were naive to the avatar at that time, but were proficient in the center-out joystick task (tests were done before experiments described in this paper). A target was randomly placed in one of four positions equidistant to the center, and the monkeys were rewarded for placing a cursor over it. (B) The images could have a friendly facial expression (lip smacking, *Left*) or an aggressive expression (bared teeth, *Right*). Three types of images were tested: photograph of a real monkey (*Top*), realistic monkey avatar (*Middle*), or unrealistic monkey avatar (*Bottom*). (C) For both monkeys, average reaching speed was lower ( $P < 0.05$ ,  $t$  test) for targets representing aggressive vs. friendly faces, but only for realistic images (photographs or realistic avatar). This effect was not observed for the unrealistic avatar ( $P > 0.3$  for both). (D) Schematics of an experiment in which monkeys passively observed an avatar arm move on the screen. Although the avatar was not connected to the joystick or a brain machine interface (BMI), primary motor (i.e., M1) and somatosensory (i.e., S1) neuronal ensembles were attuned to the avatar movements. (E) Avatar trajectories on the screen and their reconstructions from cortical modulations. Six center-out movements are shown. Blue lines indicate trajectories of the avatar arm; red lines indicate trajectories reconstructed with an unscented Kalman filter. SNR: signal to noise ratio (db)





**Table S2. Average responses response type, monkey, and cortical area**

| Monkey, cortical area,<br>response type | sync         |              |             | async        |              |
|-----------------------------------------|--------------|--------------|-------------|--------------|--------------|
|                                         | Vonly, E1    | Vonly, E2    | V+P, E2     | Vonly, E1    | Vonly, E2    |
| <b>Excited</b>                          |              |              |             |              |              |
| Monkey M                                |              |              |             |              |              |
| S1, <i>n</i> = 44/64 (73%)              |              |              |             |              |              |
| Baseline rate                           | 37.1 ± 3.0   | 34.9 ± 2.7   | 34.9 ± 2.7  | 30.9 ± 2.5   | 32.3 ± 2.6   |
| Response rate                           | 37.9 ± 3.0   | 39.0 ± 2.9   | 44.8 ± 3.5  | 32.1 ± 2.6   | 33.4 ± 2.6   |
| ΔR                                      | 0.7 ± 3.0    | 4.2 ± 2.7    | 9.9 ± 2.7   | 1.2 ± 2.5    | 1.1 ± 2.6    |
| Normalized ΔR                           | 0.03 ± 0.01  | 0.14 ± 0.02  | 0.32 ± 0.01 | 0.04 ± 0.01  | 0.05 ± 0.01  |
| M1, <i>n</i> = 64/82 (79%)              |              |              |             |              |              |
| Baseline rate                           | 17.2 ± 2.0   | 17.1 ± 1.9   | 17.7 ± 2.0  | 18.9 ± 1.9   | 19.3 ± 2.1   |
| Response rate                           | 18.3 ± 2.1   | 22.6 ± 2.4   | 29.6 ± 2.9  | 20.0 ± 2.1   | 20.9 ± 2.1   |
| ΔR                                      | 1.1 ± 2.0    | 5.5 ± 1.9    | 12.0 ± 2.0  | 1.0 ± 1.9    | 1.6 ± 2.1    |
| Normalized ΔR                           | 0.05 ± 0.01  | 0.23 ± 0.01  | 0.54 ± 0.01 | 0.04 ± 0.01  | 0.07 ± 0.01  |
| Monkey N                                |              |              |             |              |              |
| S1, <i>n</i> = 5/15 (33%)               |              |              |             |              |              |
| Baseline rate                           | —            | 15.8 ± 1.5   | 16.0 ± 1.4  | —            | 13.6 ± 3.3   |
| Response rate                           | —            | 22.2 ± 3.4   | 23.5 ± 4.0  | —            | 13.8 ± 3.3   |
| ΔR                                      | —            | 6.5 ± 1.5    | 7.5 ± 1.4   | —            | 0.2 ± 3.3    |
| Normalized ΔR                           | —            | 0.34 ± 0.01  | 0.39 ± 0.01 | —            | 0.00 ± 0.03  |
| M1, <i>n</i> = 9/34 (26%)               |              |              |             |              |              |
| Baseline rate                           | —            | 24.9 ± 5.8   | 25.8 ± 6.1  | —            | 20.8 ± 7.1   |
| Response rate                           | —            | 33.7 ± 6.2   | 35.0 ± 6.2  | —            | 21.7 ± 7.3   |
| ΔR                                      | —            | 8.9 ± 5.8    | 9.2 ± 6.1   | —            | 0.9 ± 7.1    |
| Normalized ΔR                           | —            | 0.41 ± 0.02  | 0.42 ± 0.02 | —            | 0.06 ± 0.01  |
| <b>Inhibited</b>                        |              |              |             |              |              |
| Monkey M                                |              |              |             |              |              |
| M1, <i>n</i> = 5/82 (6%)                |              |              |             |              |              |
| Baseline rate                           | 15.8 ± 4.1   | 14.6 ± 3.7   | 14.8 ± 3.6  | 14.7 ± 2.8   | 14.0 ± 2.8   |
| Response rate                           | 15.0 ± 4.2   | 11.9 ± 3.4   | 10.2 ± 3.7  | 13.8 ± 2.6   | 12.5 ± 2.7   |
| ΔR                                      | -0.9 ± 4.1   | -2.7 ± 3.7   | -4.6 ± 3.6  | -0.8 ± 2.8   | -1.5 ± 2.8   |
| Normalized ΔR                           | -0.06 ± 0.04 | -0.17 ± 0.02 | 0.03 ± 0.02 | -0.05 ± 0.03 | -0.08 ± 0.03 |
| Monkey N                                |              |              |             |              |              |
| M1, <i>n</i> = 3/34 (9%)                |              |              |             |              |              |
| Baseline rate                           | —            | 21.3 ± 5.7   | 22.5 ± 5.5  | —            | 29.7 ± 2.7   |
| Response rate                           | —            | 19.7 ± 5.4   | 20.6 ± 5.2  | —            | 28.9 ± 4.2   |
| ΔR                                      | —            | -1.6 ± 5.7   | -1.9 ± 5.5  | —            | -0.8 ± 2.7   |
| Normalized ΔR                           | —            | -0.07 ± 0.02 | 0.01 ± 0.01 | —            | -0.04 ± 0.02 |

Values presented as mean ± SEM. Only the neurons with significantly V+P responses were considered. Baseline rate was calculated for the period -1.2 to -0.2 s before the stimulus. Response rate was calculated for a 200-ms window centered at the response peak. Normalized ΔR represents the z-score of raw firing rate. async, asynchronous; ΔR, difference between response rate and baseline; E1, epoch 1; E2, epoch 2; sync, synchronous; V+P, virtual plus physical touch; Vonly, virtual touch only.
